# Supplementary material for: Validating biomarkers and models for epigenetic inference of alcohol consumption from blood
Source: Clin Epigenetics. 2021 Oct 26;13:198. doi: 10.1186/s13148-021-01186-3 (PMC8549335; doi:10.1186/s13148-021-01186-3)
Supplement: Supplementary file 2 — Additional file 2: Table S1. Which shows the replication results for the candidate-CpG association study on alcohol consumption. [file 13148_2021_1186_MOESM2_ESM.xlsx]

## Sheet: Table_over_discovery_CpGs
Table S1. Replication of 363 CpGs associated with continuous Alcohol Phenotype (P<0.05/363=1.38×10−4)
		Discovery by Liu et al.			Replication
CpG	Gene	Effect	SE	P-value	Effect	SE	P-value
cg02583484	HNRNPA1	-0.000394498	4.36e-05	1.5e-19	-0.00554958	0.000742568	1.16e-13
cg13729116	LETM1	-0.000178244	2.07e-05	6.52e-18	-0.00195499	0.000639591	0.00226778
cg05593667	NA	-0.000252447	3.09e-05	4.44e-16	-0.00228724	0.000836542	0.00630868
cg15253293	NA	-0.000140199	1.75e-05	1.11e-15	-0.00090996	0.000586472	0.120919
cg21626848	SC65	-0.000226796	2.87e-05	3.11e-15	-0.00426899	0.000762808	2.49e-08
cg03523740	TXLNA	-0.000216633	2.76e-05	4.44e-15	-0.00201899	0.000482294	2.96e-05
cg11194994	PEA15	-0.000171208	2.2e-05	7.33e-15	-0.00181427	0.000583442	0.00189957
cg06603309	KCNQ1	0.000166897	2.19e-05	2.71e-14	0.00288527	0.000725664	7.25e-05
cg06469895	TERF2	-0.000204884	2.77e-05	1.52e-13	-0.00281718	0.000653375	1.7e-05
cg00271311	CNTF	-0.000215594	2.92e-05	1.64e-13	-0.00242885	0.000807492	0.00266318
cg19266329	NA	-0.000278274	3.77e-05	1.65e-13	-0.00337863	0.00083483	5.38e-05
cg23654112	TBC1D24	-0.000137164	1.88e-05	3e-13	-0.00229523	0.000551237	3.26e-05
cg08916477	SEP_1	-0.000162837	2.24e-05	4.02e-13	-0.000160265	0.000630075	0.799244
cg03599037	C10orf58	-0.000136129	1.88e-05	4.51e-13	-0.00226534	0.000550069	3.97e-05
cg06189038	GAL3ST4	-0.000160345	2.22e-05	4.57e-13	-0.00199506	0.000551777	0.00030689
cg09737197	CPT1A	-0.00016211	2.24e-05	5.03e-13	-0.00405493	0.00066432	1.24e-09
cg16705273	SETBP1	-0.000250798	3.47e-05	5.28e-13	-0.00337607	0.00094956	0.000386104
cg05413305	NA	-0.000256816	3.56e-05	5.35e-13	-0.00222836	0.000745917	0.00284755
cg17058475	CPT1A	-0.000161893	2.26e-05	8.5e-13	-0.00369813	0.000586438	3.51e-10
cg11376147	SLC43A1	-0.00025796	3.62e-05	9.8e-13	-0.00481144	0.000467036	2.73e-24
cg00574412	ABHD15	-0.000166419	2.34e-05	1.13e-12	-0.00267348	0.000697455	0.000130369
cg09448652	SNORD30	-0.000257449	3.63e-05	1.27e-12	-0.00234605	0.000909284	0.00994716
cg20732076	TRERF1	-0.000146791	2.07e-05	1.46e-12	-0.00245119	0.000624205	8.89e-05
cg16246545	PHGDH	-0.000605981	8.57e-05	1.54e-12	-0.00761019	0.0010141	9.21e-14
cg24217948	SETBP1	-0.000276498	3.94e-05	2.14e-12	-0.00452324	0.00112331	5.87e-05
cg19238380	LMNA	-0.000294514	4.2e-05	2.24e-12	-0.00372942	0.00106728	0.000485518
cg25518868	DIAPH1	-0.000123052	1.75e-05	2.28e-12	-0.0017221	0.000473163	0.000279999
cg07502661	NA	-0.000187111	2.67e-05	2.6e-12	-0.00162625	0.000809131	0.0445783
cg27514333	SMAD6	-0.000156941	2.25e-05	2.77e-12	-0.00199839	0.000591589	0.000744034
cg12873476	NA	-0.000232506	3.33e-05	2.8e-12	-0.0047664	0.000990119	1.59e-06
cg13127741	COMMD7	-0.000229919	3.3e-05	3.1e-12	-0.00405109	0.000850266	2.03e-06
cg20970369	DENND2D	-0.000227381	3.26e-05	3.23e-12	-0.00402474	0.000746653	7.86e-08
cg00883689	SPTBN1	-0.000284744	4.09e-05	3.23e-12	-0.00385878	0.00120833	0.00142732
cg08677210	MSI2	-0.000134156	1.93e-05	3.32e-12	-0.00139172	0.00054637	0.0109323
cg21439672	C1RL	-0.000297026	4.27e-05	3.7e-12	-0.00429797	0.00118721	0.000301616
cg02104962	NA	-0.000228001	3.3e-05	4.97e-12	-0.00284688	0.000794717	0.00034871
cg23299618	NA	-0.000146487	2.13e-05	5.88e-12	-0.00178959	0.0005366	0.000868275
cg01979157	SKI	-0.000156298	2.27e-05	5.94e-12	-0.00146029	0.000530889	0.00600079
cg07251887	LOC100130933	-0.000282616	4.13e-05	7.56e-12	-0.00378944	0.000748803	4.56e-07
cg05649922	ARID1A	-0.000210145	3.07e-05	7.67e-12	-0.0022904	0.000605187	0.000158446
cg14482712	NA	-0.000178625	2.61e-05	7.71e-12	-0.0021283	0.000677439	0.00170417
cg17185710	MBNL1	-0.000212375	3.11e-05	8.1e-12	-0.00172562	0.000677216	0.0109044
cg05512483	SNORD30	-0.000345024	5.07e-05	9.89e-12	-0.00394768	0.000597637	5.05e-11
cg19693031	TXNIP	-0.000439381	6.46e-05	1.02e-11	-0.0071324	0.00112581	2.91e-10
cg16702313	C14orf43	-0.000158351	2.33e-05	1.04e-11	-0.00235702	0.000556152	2.36e-05
cg20948740	DNMT3A	-0.000285328	4.22e-05	1.34e-11	-0.00394036	0.000737856	1.03e-07
cg21429551	GARS	-0.000845343	0.000125151	1.43e-11	-0.0128352	0.00160719	2.32e-15
cg03997643	RNU6ATAC	-0.000214019	3.17e-05	1.44e-11	-0.000842635	0.00088987	0.343794
cg01234517	ACTR3C	-9.27e-05	1.38e-05	1.85e-11	-0.00113775	0.000440125	0.00980582
cg27464065	APOLD1	-0.000290383	4.33e-05	1.95e-11	-0.00308194	0.000836931	0.000237101
cg00574958	CPT1A	-0.000101269	1.51e-05	2.09e-11	-0.00220922	0.000406435	6.12e-08
cg12616487	ROM1	-0.000167865	2.51e-05	2.1e-11	-0.00215387	0.000599276	0.000333299
cg19939077	PPIF	-0.000226411	3.38e-05	2.24e-11	-0.00272258	0.000570906	1.99e-06
cg02711608	SLC1A5	-0.0004127	6.18e-05	2.43e-11	-0.00412581	0.000597996	6.97e-12
cg22797644	HMGA1	-0.000223141	3.35e-05	2.57e-11	-0.00309263	0.000550811	2.24e-08
cg20374917	FLI1	-0.000162622	2.45e-05	3.2e-11	-0.00183325	0.000716378	0.0105681
cg05683445	SBK1	-0.000169456	2.57e-05	3.95e-11	-0.00204417	0.00070361	0.00370946
cg22631938	EIF4E3	-0.000232342	3.52e-05	3.99e-11	-0.00258078	0.000933259	0.0057382
cg07797660	PRDM16	-0.000232051	3.53e-05	4.75e-11	-0.00184264	0.000621624	0.00306996
cg14034325	HNRNPF	-0.000235275	3.58e-05	5.18e-11	-0.00377491	0.00100117	0.000167626
cg02719954	NA	-0.000274083	4.18e-05	5.27e-11	-0.00389496	0.00117375	0.000921477
cg09694921	DCPS	-0.000134242	2.05e-05	5.63e-11	-0.00157356	0.000589751	0.00768738
cg08597832	TOP1MT	-0.00016218	2.48e-05	6.12e-11	-0.00238304	0.000795716	0.0027794
cg00827581	RAVER1	0.00013067	2e-05	6.59e-11	0.0014885	0.000446674	0.000876526
cg03260624	CDC7	-0.000242304	3.74e-05	8.77e-11	-0.00381017	0.000820672	3.66e-06
cg02256576	CES3	-0.00031293	4.84e-05	1e-10	-0.00398621	0.000883607	6.81e-06
cg10750182	C10orf105	-0.000133251	2.06e-05	1.04e-10	-0.00233928	0.000546556	1.96e-05
cg03184011	NA	-0.000139723	2.17e-05	1.13e-10	-0.00197863	0.000600856	0.00100835
cg06096336	PSMD1	-0.000266204	4.14e-05	1.24e-10	-0.00490666	0.00116857	2.8e-05
cg03497652	ANKS3	0.000222415	3.46e-05	1.27e-10	0.00304788	0.0010455	0.00359322
cg12662084	KIF13A	-0.000348783	5.44e-05	1.4e-10	-0.00308371	0.00158691	0.0521297
cg26829071	GPR133	0.000227163	3.55e-05	1.62e-10	0.00143341	0.000680537	0.0353017
cg26430287	SMAD3	-0.000247362	3.87e-05	1.71e-10	-0.00256039	0.00106033	0.0158362
cg03359362	SLC1A5	-6.21e-05	9.75e-06	1.87e-10	-0.00064984	0.00022933	0.00464783
cg23975840	NA	0.000267792	4.21e-05	2e-10	0.00106951	0.00104792	0.307568
cg22876908	DGKA	-0.000152717	2.4e-05	2.15e-10	-0.00215486	0.000565013	0.000140954
cg01538969	DHX16	0.000209017	3.29e-05	2.24e-10	0.000540866	0.000773914	0.484713
cg08559712	MACROD2	0.00021938	3.46e-05	2.31e-10	0.00329115	0.00094069	0.000477751
cg06983052	LRRC8D	-0.000311866	4.92e-05	2.39e-10	-0.00393997	0.000798187	8.62e-07
cg03068497	GARS	-0.000768697	0.000121588	2.58e-10	-0.0106445	0.00161021	4.89e-11
cg09326440	HLA-E	-7.55e-05	1.2e-05	2.71e-10	-0.000406548	0.000480724	0.39782
cg18590502	CCDC71	-0.000329032	5.22e-05	2.83e-10	-0.00357501	0.000898429	7.16e-05
cg12825509	TRA2B	-0.000524478	8.32e-05	2.96e-10	-0.00624508	0.00101453	9e-10
cg01236573	NA	-0.000200112	3.18e-05	3.05e-10	-0.00345388	0.000861987	6.38e-05
cg27394566	PLD4	-0.000175447	2.8e-05	3.47e-10	-0.0014932	0.000727238	0.0401772
cg14476101	PHGDH	-0.000940588	0.000150098	3.69e-10	-0.011169	0.00130484	2.21e-17
cg26569315	SLC7A5	-6.46e-05	1.03e-05	4.05e-10	-0.000266861	0.000174429	0.126194
cg18336453	PTK7	-0.000331161	5.32e-05	4.84e-10	-0.0038624	0.000634337	1.36e-09
cg11484872	TNF	-0.000238677	3.84e-05	4.91e-10	-0.00276914	0.00133328	0.0379336
cg03954858	FAM83F	0.000145633	2.35e-05	5.34e-10	0.000840995	0.000633727	0.184639
cg03689048	BAT3	-0.000111641	1.8e-05	5.36e-10	-0.00221315	0.000439548	5.2e-07
cg15827092	NA	-0.000294369	4.74e-05	5.48e-10	-0.00520312	0.00128828	5.57e-05
cg19572487	RARA	-0.000247754	4e-05	5.6e-10	-0.00501203	0.00119298	2.77e-05
cg03345232	RIN3	-0.000209487	3.38e-05	5.76e-10	-0.00213012	0.00102334	0.0375113
cg18125510	WARS	-0.00034229	5.53e-05	6.17e-10	-0.00342908	0.000802198	2e-05
cg01687189	GNPTAB	-0.000253427	4.1e-05	6.39e-10	-0.00363532	0.00111187	0.00109527
cg18328933	ABHD14B	-0.000120354	1.95e-05	6.55e-10	-0.00115686	0.000624249	0.063999
cg17865955	ITPR3	-0.000210619	3.42e-05	7e-10	-0.00266301	0.000973676	0.00629246
cg10589813	NA	-0.00043552	7.07e-05	7.18e-10	-0.00405526	0.000706599	1.1e-08
cg23534245	BMP2	-0.000186225	3.02e-05	7.31e-10	-0.0036047	0.000839086	1.82e-05
cg10317175	NA	-0.000179648	2.92e-05	7.53e-10	-0.00355198	0.000785075	6.41e-06
cg07091481	C10orf58	-0.000193968	3.16e-05	8.22e-10	-0.00384038	0.000812651	2.45e-06
cg04172771	SNTG1	-0.000264704	4.32e-05	8.63e-10	-0.00318369	0.000820463	0.000107654
cg13442969	DYRK2	-0.000362448	5.91e-05	8.68e-10	-0.00393196	0.000767042	3.24e-07
cg07176692	SLC16A1	-0.00031186	5.11e-05	1.01e-09	-0.00245553	0.00119976	0.0408197
cg10816169	NA	-0.000272511	4.46e-05	1.02e-09	-0.00209518	0.000682799	0.00217991
cg09907628	ANKRD11	-0.000134987	2.21e-05	1.03e-09	-0.00107471	0.000641376	0.0939652
cg00716257	JDP2	-0.000325731	5.34e-05	1.09e-09	-0.00204212	0.000599614	0.000672815
cg24754633	CCDC88C	-0.00013168	2.16e-05	1.12e-09	-0.00133847	0.000630478	0.03388
cg08224159	AKAP12	-0.00021809	3.58e-05	1.14e-09	-0.0039729	0.00104905	0.000156859
cg15059065	NR2F6	-0.000242701	4e-05	1.24e-09	-0.00404312	0.00106758	0.000156817
cg22871253	EZR	-0.000188219	3.1e-05	1.27e-09	-0.00166418	0.000826697	0.044242
cg00247963	NA	-0.000155303	2.56e-05	1.3e-09	-0.00059319	0.000587474	0.312746
cg06638811	RNU6ATAC	-0.000304661	5.02e-05	1.32e-09	-0.00253336	0.00120457	0.0355781
cg12067421	NA	-0.000147351	2.43e-05	1.34e-09	-0.00018853	0.000621446	0.761637
cg15821562	FOXN3	-0.000246252	4.07e-05	1.42e-09	-0.00154374	0.000706238	0.0289399
cg08115371	ODZ4	-0.000394429	6.52e-05	1.44e-09	-0.00471977	0.00129183	0.000265244
cg18954900	ELK3	-0.000233979	3.87e-05	1.44e-09	-0.00239707	0.000930651	0.0100748
cg18159646	SNORD22	-0.000256959	4.25e-05	1.45e-09	-0.00486692	0.000750072	1.09e-10
cg02654940	HMGA1	-0.000214334	3.54e-05	1.45e-09	-0.00254745	0.000591124	1.71e-05
cg14676592	NA	-0.0001352	2.24e-05	1.48e-09	-0.00162173	0.00056311	0.00401944
cg03485667	ZNRF1	-0.000200024	3.31e-05	1.51e-09	-0.00274935	0.000714467	0.000122734
cg17390562	EZR	-0.000140907	2.33e-05	1.59e-09	-0.00175776	0.000553083	0.0015049
cg11555067	INPP4A	-0.000185638	3.08e-05	1.75e-09	-0.00377128	0.000765651	9.1e-07
cg09257526	IL6R	-0.00012733	2.12e-05	1.8e-09	-0.00155938	0.000450194	0.000543745
cg00812770	NA	0.000127112	2.11e-05	1.82e-09	0.00159113	0.000612413	0.00944143
cg06846495	NCL	-0.000233729	3.89e-05	1.86e-09	-0.000297122	0.000986819	0.763377
cg26103104	NA	-0.000343059	5.71e-05	1.92e-09	-0.00580602	0.00160415	0.000302595
cg04781796	GABRD	0.000201398	3.35e-05	1.93e-09	0.000789826	0.000950723	0.406206
cg02578470	MCM2	-0.000237701	3.96e-05	2.03e-09	-0.00305925	0.000814505	0.000177575
cg02231404	SOX18	-0.000312955	5.22e-05	2.03e-09	-0.00388756	0.00164425	0.0181569
cg00045114	NA	0.000249484	4.16e-05	2.04e-09	0.00270063	0.00115382	0.0193497
cg20945261	NUP210	-0.000191839	3.2e-05	2.08e-09	-0.00215162	0.000529434	5.01e-05
cg18282388	TMEM45B	0.0002136	3.57e-05	2.14e-09	0.00226318	0.000739082	0.00222662
cg05465916	LOC284023	-0.00019089	3.19e-05	2.17e-09	-0.000893947	0.000901133	0.321304
cg23712594	PARP1	-0.000196963	3.29e-05	2.18e-09	-0.00255253	0.000792804	0.00130401
cg16568360	TAOK2	-0.000111562	1.87e-05	2.25e-09	-0.00107439	0.000581585	0.0648423
cg18765542	DGKZ	-0.000142943	2.39e-05	2.28e-09	-0.00171807	0.000595277	0.00394115
cg21248060	C7orf50	0.000208003	3.48e-05	2.29e-09	0.00195285	0.000586497	0.000885106
cg06644515	SNORD47	-0.000365342	6.11e-05	2.3e-09	-0.00586229	0.000851029	7.51e-12
cg06516865	ETV6	-0.000151603	2.54e-05	2.34e-09	-0.00290581	0.000566252	3.15e-07
cg21369801	CSNK1D	0.000197715	3.32e-05	2.48e-09	0.00220765	0.000964404	0.0221744
cg27386529	SCAP	-0.000198814	3.34e-05	2.61e-09	-0.000868465	0.000956455	0.363985
cg04487857	SLC7A11	0.000109109	1.83e-05	2.65e-09	0.00114346	0.000452291	0.0115421
cg05457221	NA	-0.000131515	2.21e-05	2.69e-09	-0.000681431	0.000664679	0.30539
cg21533897	NRXN2	0.000113815	1.91e-05	2.72e-09	0.00078593	0.000491595	0.110037
cg17192599	PRKAG2	0.000193391	3.25e-05	2.8e-09	6.05e-06	0.000941859	0.994875
cg05903736	HDAC4	-0.000164016	2.76e-05	2.89e-09	-0.00170234	0.000717538	0.0177629
cg18394552	NA	0.000367256	6.19e-05	3.03e-09	0.00361576	0.00108433	0.000869878
cg18120259	LOC100132354	-0.00052297	8.82e-05	3.04e-09	-0.00624015	0.000730544	2.56e-17
cg09042952	LOC338799	-4.57e-05	7.71e-06	3.11e-09	-9.65e-05	8.65e-05	0.265013
cg19240637	RNF144A	-0.000223937	3.78e-05	3.21e-09	-0.00182612	0.000764852	0.0170528
cg11682350	VPS52	-5.63e-05	9.51e-06	3.23e-09	-0.000811911	0.000272179	0.00288866
cg00986580	NA	-0.000245028	4.14e-05	3.3e-09	-0.00473851	0.00105088	6.88e-06
cg19578183	NA	-0.000248248	4.2e-05	3.33e-09	-0.00261333	0.000733493	0.000375356
cg14473743	NUP210	-0.000260987	4.41e-05	3.38e-09	-0.00103065	0.00122572	0.40053
cg25612391	SLC25A42	-0.000257381	4.35e-05	3.39e-09	-0.00278141	0.00134118	0.0382195
cg27479634	ATP5G2	-0.000216929	3.67e-05	3.45e-09	-0.00234213	0.000735756	0.00147828
cg04961225	NA	0.00023287	3.94e-05	3.51e-09	0.00105436	0.000972554	0.278444
cg23913963	RCC2	-0.000267259	4.53e-05	3.59e-09	-0.00592489	0.000868798	1.2e-11
cg03329539	NA	-0.000229792	3.89e-05	3.6e-09	-0.00536238	0.0009747	4.24e-08
cg09182138	BCAN	-0.000154312	2.61e-05	3.6e-09	-0.00181361	0.0006785	0.00757879
cg06690548	SLC7A11	-0.00133477	0.00022661	3.86e-09	-0.014018	0.00105824	1.83e-38
cg08429256	SLC16A3	-0.000155808	2.65e-05	4.03e-09	-0.00145522	0.000683038	0.0332499
cg07180646	TMEM51	-0.000229401	3.9e-05	4.13e-09	-0.00494089	0.00109808	7.2e-06
cg15699524	FGF18	-0.000153203	2.61e-05	4.13e-09	-0.00253822	0.000744651	0.000665807
cg11197916	NA	-0.000159894	2.72e-05	4.14e-09	-0.0027227	0.000690402	8.3e-05
cg18530324	KIAA0427	-0.000173123	2.95e-05	4.34e-09	-0.00136486	0.000736004	0.0638255
cg05012902	VAMP2	-0.000165956	2.83e-05	4.41e-09	-0.00290722	0.000642715	6.44e-06
cg04610235	MTMR4	-0.000131691	2.25e-05	4.58e-09	-0.000410159	0.000542412	0.449632
cg00622166	GPT2	-0.000265203	4.53e-05	4.61e-09	-0.00396023	0.000700841	1.83e-08
cg15804598	HEXIM1	-0.000228213	3.89e-05	4.65e-09	-0.00230313	0.000556106	3.59e-05
cg08335767	HMGA1	-0.000189721	3.24e-05	4.75e-09	-0.00189078	0.000500689	0.000163749
cg12807764	NA	-0.000256786	4.39e-05	5e-09	-0.0036449	0.00124644	0.00349133
cg16889557	NA	-0.000190117	3.25e-05	5.07e-09	-0.00363721	0.00097934	0.000209608
cg05721773	FAIM3	-0.000175489	3e-05	5.08e-09	-0.00173197	0.00050482	0.000613789
cg07104958	ANUBL1	-0.00026315	4.51e-05	5.27e-09	-0.000377404	0.000847104	0.65599
cg25342059	MBNL1	-0.000210897	3.62e-05	5.75e-09	-0.00299469	0.000881021	0.000689205
cg24848615	NFIC	-0.000183639	3.15e-05	5.77e-09	-0.00318902	0.000935352	0.000663799
cg00594278	GRAP2	-0.000188514	3.24e-05	5.78e-09	-0.00365032	0.000904443	5.64e-05
cg17768768	CARD11	0.000133472	2.29e-05	5.88e-09	0.000870428	0.000408402	0.0331852
cg12188860	TOP1MT	-0.000239327	4.12e-05	6.17e-09	-0.00418007	0.00123261	0.000709231
cg04916802	MIR548F5	-0.000196928	3.39e-05	6.33e-09	-0.00218753	0.000642465	0.000674847
cg19803952	DBNDD2	-0.000159896	2.76e-05	6.65e-09	-0.00135792	0.000846391	0.108791
cg14274621	NA	-0.000137268	2.37e-05	6.67e-09	-0.0027049	0.000623973	1.53e-05
cg00291478	RGS10	-0.000339377	5.85e-05	6.69e-09	-0.0031029	0.00103103	0.00264912
cg01201215	ATOX1	-0.000155998	2.69e-05	6.76e-09	-0.00142829	0.000821093	0.0821009
cg24750156	B4GALNT1	-0.00020192	3.5e-05	8.04e-09	-0.00334045	0.00106893	0.00180323
cg00510149	MRVI1	-0.000156796	2.72e-05	8.14e-09	-0.000729816	0.000793553	0.35785
cg02341119	MGAT5B	-0.000244633	4.24e-05	8.15e-09	-0.00203032	0.000779137	0.00923194
cg12866859	HEXIM1	-0.000183138	3.18e-05	8.32e-09	-0.00203017	0.000529711	0.000130684
cg00817377	ELN	-0.000128232	2.23e-05	8.36e-09	-0.00181691	0.00065843	0.00584219
cg18101225	FGFBP2	0.000102643	1.78e-05	8.45e-09	0.000993235	0.000531938	0.062019
cg10554624	ECHDC2	-0.000214178	3.72e-05	8.62e-09	-0.000312683	0.000894139	0.726598
cg25643223	SPATA13	-0.000190149	3.3e-05	8.64e-09	-0.00111655	0.000739994	0.131489
cg24420742	NA	-0.000197272	3.43e-05	8.68e-09	-0.00310146	0.00106988	0.00378521
cg21578195	PTK6	-0.000118018	2.05e-05	8.69e-09	-0.00116946	0.000533424	0.0284675
cg08687540	LSP1	0.00013942	2.42e-05	8.93e-09	0.00106064	0.000691258	0.125098
cg19390658	GARS	-0.000583007	0.000101475	9.18e-09	-0.00539989	0.00127978	2.56e-05
cg00432454	C20orf54	-0.000117396	2.04e-05	9.35e-09	0.000425883	0.00067481	0.528037
cg24642820	NUP210	-0.000302378	5.27e-05	9.53e-09	-0.000152649	0.00142162	0.914501
cg23166988	NA	-0.000276846	4.83e-05	9.73e-09	-0.00259299	0.0011073	0.0192919
cg09856467	TPST2	0.000176869	3.08e-05	9.73e-09	0.000985284	0.000707044	0.163615
cg15055101	SH2D3A	-0.000162025	2.83e-05	1e-08	-0.00177461	0.00058837	0.0025921
cg14145074	ACTB	-0.000142457	2.49e-05	1.02e-08	-0.00244821	0.000621389	8.43e-05
cg14330293	MYO1C	0.000128562	2.25e-05	1.03e-08	0.00190642	0.000575566	0.000941831
cg23444264	NA	-0.000193418	3.38e-05	1.04e-08	-0.00166522	0.00103893	0.109128
cg06980173	IL6R	-0.000173694	3.04e-05	1.05e-08	-0.00280847	0.000699017	6.09e-05
cg17757575	RASL10B	-0.000205722	3.6e-05	1.07e-08	-0.00151959	0.00101785	0.135611
cg26312998	ZNF318	-0.000170625	2.99e-05	1.09e-08	-0.000300819	0.00101116	0.766116
cg20674424	MIR1248	-0.000210537	3.68e-05	1.11e-08	-0.00244492	0.000606955	5.83e-05
cg03627290	PNKD	-0.000109782	1.92e-05	1.12e-08	-0.00176004	0.000466054	0.000163667
cg01940273	NA	-0.000455966	7.99e-05	1.13e-08	-0.0080924	0.00119051	1.4e-11
cg18482892	ARHGEF3	-0.000225543	3.95e-05	1.15e-08	-0.00226089	0.000770039	0.00336163
cg27492942	CISD3	-0.000189492	3.32e-05	1.17e-08	-0.00301571	0.00108875	0.00565914
cg17164905	AHDC1	-0.00013746	2.41e-05	1.17e-08	-0.0018428	0.000681682	0.00692289
cg06533408	SLC35E3	-0.000170064	2.98e-05	1.17e-08	-0.00265021	0.00103744	0.0107051
cg04460609	LDB2	-0.000371151	6.52e-05	1.23e-08	-0.00508537	0.000929322	5e-08
cg00464927	LRP5	0.000122261	2.15e-05	1.24e-08	0.0011138	0.000436854	0.0108583
cg13879047	GRB10	-0.000111936	1.97e-05	1.26e-08	-0.00249962	0.000532328	2.84e-06
cg27486585	HLA-E	-0.000183923	3.23e-05	1.27e-08	-0.00186939	0.00077965	0.0165874
cg22505006	ZBTB7B	-0.000163279	2.87e-05	1.28e-08	-0.00259107	0.000722054	0.000340555
cg19554457	NUDT4	-0.000234466	4.12e-05	1.28e-08	-0.00275337	0.00117133	0.0188373
cg00085438	MBNL1	-0.00021381	3.76e-05	1.28e-08	-0.00149184	0.00109844	0.174571
cg22510139	PRDM16	-0.000239165	4.2e-05	1.29e-08	-0.00287311	0.000957086	0.00271566
cg07451297	MPDU1	-0.00015954	2.81e-05	1.33e-08	-0.00269244	0.000640215	2.72e-05
cg07735969	SMPD3	-0.000109615	1.93e-05	1.36e-08	-0.00151473	0.000513729	0.00323003
cg21130958	CRISPLD1	-0.000182331	3.21e-05	1.38e-08	-0.00337171	0.000676952	6.87e-07
cg26039141	RPS3	-0.000127455	2.25e-05	1.38e-08	-0.000841794	0.000509673	0.0987647
cg07567724	GATAD2B	-0.000346834	6.12e-05	1.43e-08	-0.0028877	0.000811519	0.000381775
cg26091247	NA	8.12e-05	1.43e-05	1.49e-08	0.000128764	0.000397355	0.745931
cg17485681	CDH23	-0.000230398	4.07e-05	1.51e-08	-0.00161283	0.000940131	0.0864014
cg20484086	NA	-0.000260199	4.6e-05	1.52e-08	-0.00266217	0.000545277	1.13e-06
cg11617964	PRRT1	-0.000305609	5.4e-05	1.54e-08	-0.00473077	0.00134151	0.000430568
cg12754982	IGF2R	-0.000175109	3.1e-05	1.56e-08	-0.0045601	0.000864442	1.47e-07
cg04737759	NA	0.000101883	1.8e-05	1.59e-08	0.000819377	0.000520641	0.115694
cg10089657	C7orf50	0.000122239	2.17e-05	1.66e-08	0.000896124	0.000580712	0.122952
cg23629150	TOP1MT	-0.000240933	4.27e-05	1.67e-08	-0.00373059	0.00110536	0.00075218
cg03021802	EPB49	-0.000183841	3.26e-05	1.7e-08	-0.00329094	0.000876921	0.00017979
cg24135793	NFIX	-0.000293472	5.21e-05	1.74e-08	-0.00249886	0.00100992	0.0134309
cg00326958	HNRNPF	-0.000185588	3.29e-05	1.76e-08	-0.00298101	0.000526439	1.7e-08
cg06934523	KIAA0247	-0.00020561	3.65e-05	1.76e-08	-0.00330677	0.000733912	7e-06
cg12554573	PARP3	-0.000141513	2.51e-05	1.79e-08	-0.00173331	0.000726702	0.017163
cg06657944	TBL1XR1	-7.46e-05	1.33e-05	1.81e-08	-0.000343522	0.000382898	0.369739
cg14035045	HEMK1	-0.000169382	3.01e-05	1.85e-08	-0.001662	0.000718083	0.0207403
cg09613192	NA	-0.000278778	4.96e-05	1.87e-08	-0.00267669	0.00103687	0.00990682
cg03603530	PDF	-0.000108706	1.93e-05	1.92e-08	-0.00154212	0.000613816	0.0120709
cg05603985	SKI	-0.000253797	4.52e-05	1.94e-08	-0.00284889	0.000526725	7.1e-08
cg05915866	ZFHX3	-0.000261383	4.66e-05	2e-08	-0.00200394	0.00139949	0.152326
cg00549412	SLC37A1	-0.000191036	3.4e-05	2e-08	-0.000599568	0.000893238	0.502151
cg12752647	SPOCK2	-0.000129638	2.31e-05	2.01e-08	-0.000851428	0.00059078	0.149686
cg08766770	XPO6	-0.000130424	2.32e-05	2.02e-08	-0.000505212	0.00060363	0.402716
cg00657780	NA	-0.000179482	3.2e-05	2.03e-08	-0.00217702	0.000713973	0.00232464
cg07556911	MAD1L1	0.000123825	2.21e-05	2.1e-08	0.0011346	0.000584274	0.0522878
cg09365259	TUBA8	-0.000182845	3.26e-05	2.14e-08	-0.00121455	0.000916566	0.185285
cg27180443	SCARB1	-0.000226013	4.04e-05	2.2e-08	-0.00138559	0.000607813	0.0227341
cg22332722	CDH2	-0.000361164	6.46e-05	2.22e-08	-0.00485072	0.00224908	0.0311427
cg04418434	RREB1	-0.000133156	2.38e-05	2.25e-08	-0.00218365	0.000786586	0.0055522
cg23893460	PKM2	0.000104928	1.88e-05	2.28e-08	0.00123557	0.000498815	0.0133302
cg01850135	NMRAL1	0.000191881	3.43e-05	2.31e-08	0.00138772	0.000652384	0.0335293
cg22268510	PRRT1	-0.000285806	5.12e-05	2.34e-08	-0.00650616	0.00155503	2.99e-05
cg05152300	XYLT1	-0.000135229	2.42e-05	2.34e-08	-0.00200997	0.000696136	0.00392671
cg08840551	NA	-0.00017046	3.05e-05	2.36e-08	-0.00213113	0.000936327	0.0229474
cg07286682	MIR548H4	0.000197101	3.53e-05	2.39e-08	0.00154436	0.00103735	0.136709
cg05262369	NUCKS1	-0.000159431	2.86e-05	2.41e-08	-0.00177644	0.000818756	0.0301473
cg18483487	NA	-0.00020568	3.69e-05	2.42e-08	-0.00274826	0.00104287	0.00847111
cg07512517	NA	-0.000171301	3.07e-05	2.48e-08	-0.00271361	0.000803264	0.000743438
cg05527044	NA	-0.000115123	2.07e-05	2.5e-08	-0.00167732	0.000562883	0.00291818
cg15117681	CSNK1D	0.00013987	2.51e-05	2.59e-08	0.00175779	0.000688831	0.0107884
cg16290996	GAS5	-0.000319806	5.75e-05	2.61e-08	-0.00695824	0.000960831	6.27e-13
cg03339609	LSM14A	-0.000301051	5.41e-05	2.66e-08	-0.0031101	0.000618674	5.42e-07
cg03617456	EXOSC10	-9.87e-05	1.77e-05	2.68e-08	-0.00177611	0.00052829	0.000788252
cg05668853	RAB34	-0.000200714	3.61e-05	2.68e-08	-0.00204218	0.000893307	0.0223525
cg10456541	NA	-0.000190486	3.43e-05	2.69e-08	-0.00193066	0.000813615	0.0177406
cg07805604	CCDC106	-0.000144105	2.59e-05	2.72e-08	-0.00189202	0.000645999	0.0034407
cg21846790	FAM100A	-0.00013504	2.43e-05	2.78e-08	-0.00220029	0.000589763	0.000196146
cg09906145	FAM65A	-9.78e-05	1.76e-05	2.81e-08	-0.00110383	0.000504335	0.0287348
cg09577455	GABBR1	-0.000155485	2.8e-05	2.97e-08	-0.00122522	0.000767514	0.110568
cg17378803	NA	-0.00024546	4.43e-05	2.98e-08	-0.00263952	0.000686489	0.000124315
cg02314339	NA	-0.000254186	4.59e-05	3.06e-08	-0.00297307	0.000694708	1.96e-05
cg02282631	NA	-0.000324862	5.87e-05	3.07e-08	-0.00329666	0.00163222	0.0435418
cg01378158	PLEKHG4	-0.000167519	3.03e-05	3.11e-08	-0.00258831	0.000727609	0.000383368
cg22052056	DNMT3B	-0.000179502	3.25e-05	3.37e-08	-0.00226797	0.000683092	0.000915735
cg25197194	CCDC48	0.000299216	5.42e-05	3.38e-08	0.00245243	0.00114631	0.0325217
cg00026553	ZNF710	-0.000154797	2.81e-05	3.43e-08	-0.0020493	0.000628323	0.00112662
cg16696035	FLCN	8.68e-05	1.57e-05	3.49e-08	0.00122481	0.000393502	0.00188064
cg08062273	LIMD1	-0.000109838	1.99e-05	3.61e-08	-0.000305719	0.000534926	0.567713
cg06226150	SLC2A4RG	-0.000141288	2.57e-05	3.79e-08	-0.00149825	0.000568543	0.00847221
cg19731612	NSD1	-0.00062134	0.000112976	3.8e-08	-0.0101153	0.00171917	4.68e-09
cg13077865	NA	0.000173048	3.15e-05	3.87e-08	0.00122822	0.0007765	0.113866
cg03959515	FAM84B	-0.000106696	1.94e-05	3.9e-08	-0.000415832	0.000660219	0.528871
cg03382805	NA	0.000120359	2.19e-05	3.93e-08	9.99e-05	0.000503496	0.842699
cg05756780	IL6R	-0.00014366	2.62e-05	3.98e-08	-0.00218618	0.000586471	0.000198578
cg05991220	ITIH1	0.000217716	3.96e-05	3.98e-08	0.00152469	0.000949684	0.108548
cg10045354	C11orf93	-0.000219318	4e-05	4.27e-08	-0.00196405	0.000808091	0.0151654
cg04006143	NDUFC1	-0.000239695	4.38e-05	4.37e-08	-0.00447744	0.00122359	0.000259441
cg05951221	NA	-0.000605113	0.000110538	4.39e-08	-0.00904961	0.00129804	4.23e-12
cg27491190	SLC38A2	-0.000231754	4.23e-05	4.4e-08	-0.00300448	0.000811864	0.000220758
cg19202384	PYCR1	-0.000261545	4.78e-05	4.55e-08	-0.00223346	0.000735913	0.00243654
cg20188739	SNORD87	-0.000212576	3.89e-05	4.66e-08	-0.00394501	0.000948626	3.34e-05
cg11405200	NA	-0.000161143	2.95e-05	4.66e-08	-0.00290811	0.000925726	0.00170564
cg08297686	RAD51L1	-0.000334244	6.12e-05	4.68e-08	-0.00326666	0.000744924	1.22e-05
cg09175009	FAM18A	-0.000197238	3.62e-05	4.87e-08	-0.00148236	0.000764791	0.0527324
cg12699156	SHBG	-0.000135542	2.48e-05	4.88e-08	-0.00162444	0.000688511	0.0184017
cg13539253	NA	-7.35e-05	1.35e-05	5.08e-08	-0.00159832	0.000507217	0.00165014
cg15890469	PGF	-0.000238749	4.38e-05	5.1e-08	-0.000642477	0.00131974	0.626438
cg08293528	CDH23	-0.000143323	2.63e-05	5.17e-08	-0.000435503	0.000628138	0.488186
cg04605617	PLA2G2C	-0.000259599	4.77e-05	5.19e-08	-0.00496471	0.001134	1.26e-05
cg11700584	RPL36AL	-0.000273901	5.03e-05	5.3e-08	-0.00502725	0.000984201	3.56e-07
cg09029902	ZNF217	-9.48e-05	1.74e-05	5.31e-08	-0.00133768	0.000549483	0.0150018
cg04661001	SLC25A42	-0.000298416	5.49e-05	5.36e-08	-0.00260305	0.00122895	0.0342876
cg24711224	NSD1	-0.000164883	3.03e-05	5.44e-08	-0.0017371	0.000409196	2.28e-05
cg21848084	PRDM16	0.000149616	2.75e-05	5.49e-08	0.000872079	0.000741785	0.239874
cg05129477	KIF17	-0.00023488	4.32e-05	5.6e-08	-0.00273907	0.0012293	0.0259796
cg16505233	EDEM1	-9.5e-05	1.75e-05	5.69e-08	-0.000790051	0.000256932	0.00213373
cg05359207	ZNF217	-5.5e-05	1.01e-05	5.69e-08	-0.000712468	0.000294973	0.0158079
cg01487468	NA	-0.000145833	2.69e-05	5.69e-08	-0.00169611	0.000757571	0.0252725
cg18018313	IRS1	-0.000234742	4.33e-05	5.75e-08	-0.0023812	0.000720547	0.000967414
cg02343604	ID3	-0.000152012	2.8e-05	5.75e-08	-0.000516623	0.000662649	0.435699
cg26405097	JARID2	-0.000156887	2.89e-05	5.94e-08	-0.00332353	0.000739596	7.4e-06
cg24570624	C14orf4	-0.000178699	3.3e-05	5.97e-08	-0.00181932	0.000948539	0.055249
cg09646173	PDE6A	-0.000287911	5.32e-05	6.18e-08	-0.00546394	0.000929766	4.89e-09
cg27020362	MGC29506	0.000194607	3.6e-05	6.26e-08	0.00161819	0.000589885	0.00613769
cg06474661	NA	-0.000128622	2.38e-05	6.38e-08	-0.0018008	0.00065869	0.00631329
cg24141382	CTPS	-0.000150319	2.78e-05	6.43e-08	-0.00184937	0.000687634	0.00721551
cg02499214	RHOF	-6.44e-05	1.19e-05	6.49e-08	-0.0011413	0.000358523	0.00147814
cg05751148	PTPRCAP	0.000134007	2.48e-05	6.5e-08	0.00113676	0.000394553	0.00400435
cg08276755	NA	-0.000159783	2.96e-05	6.54e-08	-0.00129772	0.000726806	0.0743285
cg11704631	RUNX1	-0.000321075	5.95e-05	6.7e-08	-0.00418356	0.000825979	4.46e-07
cg06126421	NA	-0.000286062	5.31e-05	6.99e-08	-0.0132984	0.00153529	9.35e-18
cg07507418	TRERF1	-0.000193753	3.6e-05	7.15e-08	-0.0018201	0.00053918	0.000750318
cg16492851	C7orf50	0.000120033	2.23e-05	7.16e-08	0.00112018	0.000612404	0.0675248
cg21201109	KANK2	-0.000163329	3.03e-05	7.18e-08	-0.00127998	0.000728453	0.0790498
cg16744438	DDX6	-0.000192991	3.58e-05	7.26e-08	-0.0018106	0.000650048	0.00539739
cg03877174	KIF1C	0.000131267	2.44e-05	7.3e-08	0.000956971	0.000596706	0.108924
cg00546117	RERE	-0.000207682	3.86e-05	7.33e-08	-0.00243203	0.00122827	0.0478339
cg21226442	C12orf11	-0.00023626	4.39e-05	7.37e-08	-0.00453197	0.000975636	3.62e-06
cg20204986	WT1	-0.000178141	3.31e-05	7.5e-08	-0.00164309	0.00101634	0.106107
cg03575969	STARD10	-0.00016961	3.16e-05	7.87e-08	-0.00147293	0.000775385	0.0576266
cg23579062	C9orf25	-0.000141735	2.64e-05	7.97e-08	-0.00144888	0.000782841	0.0643454
cg19730982	C7orf50	9.62e-05	1.79e-05	8e-08	8e-06	0.000512649	0.987558
cg07447742	MLNR	-0.000216734	4.04e-05	8.12e-08	-0.00217734	0.00121946	0.0743312
cg17962756	NA	-0.000403039	7.51e-05	8.18e-08	-0.00530698	0.00094979	2.62e-08
cg24146100	DOCK9	-0.000229638	4.28e-05	8.25e-08	-0.00323617	0.00125805	0.0101714
cg01735398	SLC5A10	-0.000227915	4.25e-05	8.36e-08	-0.00243066	0.000946708	0.0103154
cg07626482	SLC1A5	-0.000335371	6.26e-05	8.39e-08	-0.00387612	0.000573825	1.86e-11
cg14442518	NA	0.000120076	2.24e-05	8.41e-08	0.00117807	0.00063226	0.0625708
cg02431260	ESAM	-0.000438112	8.18e-05	8.42e-08	-0.00570543	0.00137441	3.45e-05
cg01972009	PITPNM1	-0.000190542	3.56e-05	8.47e-08	-0.00240863	0.00058158	3.59e-05
cg05130679	AMOTL1	-0.000190281	3.55e-05	8.57e-08	-0.00189477	0.00116068	0.102737
cg03846076	STC2	0.000366331	6.84e-05	8.58e-08	0.0026463	0.00117108	0.0239455
cg21791017	LTK	-0.000191272	3.57e-05	8.69e-08	-0.00289942	0.000913808	0.00153198
cg14391586	SOX18	-0.000187694	3.51e-05	8.81e-08	-0.00397996	0.00108411	0.000247714
cg09535960	LOXL2	0.000171727	3.21e-05	8.85e-08	0.000442557	0.000824064	0.591298
cg14051147	NA	-0.000129371	2.42e-05	8.95e-08	-0.00156749	0.000446573	0.000457868
cg06799321	CES3	-0.000220922	4.13e-05	9.02e-08	-0.00315077	0.000678312	3.62e-06
cg05356319	NFIX	-0.000359577	6.73e-05	9.08e-08	-0.00237406	0.000922859	0.0101675
cg19030682	SLC38A10	0.000178458	3.34e-05	9.22e-08	0.000152818	0.000922491	0.868443
cg11980897	NA	-0.000136188	2.55e-05	9.37e-08	-0.00220163	0.000700256	0.00169063
cg03450635	FAM198B	-0.000225637	4.23e-05	9.44e-08	-0.00256242	0.000834294	0.00215934
cg22451412	EHD4	0.000110606	2.07e-05	9.73e-08	0.000439503	0.000471932	0.351818
cg00313914	NAV1	-0.000446595	8.38e-05	9.89e-08	-0.00719933	0.00244963	0.00333078
cg18763536	ETV6	-0.000262462	4.93e-05	9.94e-08	-0.00270567	0.000608595	9.23e-06
Discovery results are obtained from the paper published by Liu et al. as presented in Supplementary Table S2
Replication results are obtained using; CpG ~ log (alcohol intake g per day + 1) + sex + BMI + Age + Batch effect + WBC
NA; There is no specific gene annotated to this CpG
