# Supplementary material for: Validating biomarkers and models for epigenetic inference of alcohol consumption from blood
Source: Clin Epigenetics. 2021 Oct 26;13:198. doi: 10.1186/s13148-021-01186-3 (PMC8549335; doi:10.1186/s13148-021-01186-3)
Supplement: Supplementary file 7 — Additional file 7: Tables S21. Providing the coefficients for our two new models including four-categories for each marker set. [file 13148_2021_1186_MOESM7_ESM.xlsx]

## Sheet: Coeffs_4_cat
Table S21. CpGs included per model and their coefficients in the prediction models.
	Heavy and at-risk drinkers vs. light and non-drinkers				Heavy, at-risk, and light drinkers vs. non-drinkers
	144-CpG	78-CpG	23-CpG	5-CpG	144-CpG	78-CpG	23-CpG	5-CpG
IlmnID	model	model	model	model	model	model	model	model
(Intercept)	-1.63225	-1.56247	-1.49101	-1.45525	1.74336	1.68855	1.62663	1.6095
cg06690548	-6.52747	-7.79376	-9.79819	-10.7817	-3.55578	-4.92666	-6.51869	-6.77491
cg12825509	-2.96695	-2.38064	-4.53293	-4.86104	-0.0677682	0.291753	-0.412564	-0.61406
cg00252472	0.202191	0.26242	-0.304885	-1.21741	1.02195	0.871506	0.0530982	-0.580913
cg06846495	3.84675	3.64434	3.20658	2.02682	0.929815	0.583301	0.841851	0.562729
cg18282388	6.61679	5.44339	4.4744	4.35522	1.11499	0.919021	1.62116	1.96706
cg17058475	-4.53101	-5.04204	-6.03518	-	0.477523	0.296957	-0.797329	-
cg21626848	-1.53643	-2.52393	-4.47834	-	-0.418101	-0.825667	-0.0117223	-
cg02499214	-3.39098	-3.29045	-4.42838	-	-3.89602	-3.97807	-3.42974	-
cg12197470	-1.72779	-1.60536	-2.33203	-	-1.35622	-0.985869	-1.40591	-
cg18125510	-0.792497	-1.1474	-2.13412	-	-1.21354	-1.32402	-0.27099	-
cg08677210	-2.19462	-1.35401	-1.99995	-	-2.17546	-1.95773	-2.82828	-
cg02489552	-0.57694	-0.628861	-1.20497	-	-0.0590317	-0.237967	0.281479	-
cg17185710	-1.26716	-0.987704	-0.210719	-	-2.11092	-2.14772	-1.81148	-
cg11613559	-0.363984	-0.0728828	-0.188803	-	0.067785	-0.146909	-0.215246	-
cg08916477	0.315031	0.298219	-0.0816154	-	-0.317117	-1.44038	-1.09208	-
cg10665488	1.47291	2.26979	-0.0369741	-	0.558978	0.172239	1.11793	-
cg15821562	0.205998	0.3528	-0.0224684	-	-0.562691	0.0106953	-0.486219	-
cg10816169	1.78713	-	0.026988	-	-1.83947	-	-1.00191	-
cg09365259	0.923965	0.513761	0.136761	-	0.365908	-0.292958	0.461128	-
cg10121429	4.10665	3.19094	0.637969	-	1.80887	0.613479	1.62585	-
cg05457221	2.74814	1.71576	1.108	-	2.73792	1.82774	1.31079	-
cg04487857	0.970585	1.62994	2.37191	-	1.57881	1.74373	1.60726	-
cg13222915	7.22273	6.14355	5.80711	-	5.56724	5.22865	6.01303	-
cg03599037	-5.433	-6.32453	-	-	0.394714	0.522867	-	-
cg06469895	-5.35372	-5.57948	-	-	-1.57044	-1.37757	-	-
cg15253293	-4.04215	-4.39032	-	-	0.895037	0.047165	-	-
cg03725309	-2.55905	-3.85041	-	-	-2.36557	-3.37986	-	-
cg18933331	-3.64953	-3.72286	-	-	-2.08383	-3.14887	-	-
cg11682350	-3.20077	-3.30013	-	-	5.55013	3.7752	-	-
cg24242519	-3.22586	-2.71491	-	-	2.33151	1.74807	-	-
cg00986580	-2.2	-2.68699	-	-	-2.01596	-2.12884	-	-
cg04843111	-2.83568	-2.57177	-	-	-0.508545	-1.19696	-	-
cg04907244	-2.54241	-2.37721	-	-	-1.23142	-1.00609	-	-
cg20970369	-2.42955	-2.18179	-	-	-2.64145	-2.14262	-	-
cg16290996	-2.18196	-2.05441	-	-	-2.1005	-2.01371	-	-
cg21870662	-1.44612	-2.01773	-	-	0.196357	-2.17223	-	-
cg02394812	-1.9939	-1.8916	-	-	2.8505	2.3532	-	-
cg01687189	-1.87096	-1.82887	-	-	0.493384	0.116745	-	-
cg08962271	-0.991936	-1.71867	-	-	-2.47742	-2.17577	-	-
cg01526748	-1.26822	-1.2653	-	-	-0.879654	-0.788718	-	-
cg09326440	-0.138354	-1.15577	-	-	-0.139051	-0.552632	-	-
cg05143694	-1.5131	-1.08813	-	-	0.00307039	-0.0394047	-	-
cg16977872	0.904313	-1.03132	-	-	-3.02983	-5.0236	-	-
cg11414821	1.1502	-0.900593	-	-	4.85307	4.92375	-	-
cg24754633	-0.917564	-0.745655	-	-	-2.23092	-2.02487	-	-
cg02719954	-1.00864	-0.66862	-	-	-1.11962	-0.775841	-	-
cg00883689	-0.71646	-0.664511	-	-	-1.17138	-0.849818	-	-
cg03997643	-0.114726	-0.659469	-	-	2.93085	2.03651	-	-
cg07173823	-2.16627	-0.610898	-	-	-1.41711	-0.849315	-	-
cg05670953	-0.331975	-0.58868	-	-	-0.416796	-0.689521	-	-
cg08115371	-0.594937	-0.561614	-	-	0.142997	-0.193729	-	-
cg27537125	-1.84905	-0.434177	-	-	9.58499	8.94543	-	-
cg05903736	0.207153	-0.331001	-	-	1.95349	1.47911	-	-
cg17192599	-0.47174	-0.310478	-	-	0.239862	0.25639	-	-
cg11130692	-0.0783462	-0.122921	-	-	2.48946	2.5374	-	-
cg00567854	-0.108302	-0.0445584	-	-	0.220683	0.389006	-	-
cg18336453	1.28806	-0.0437722	-	-	-2.48705	-3.09826	-	-
cg19704902	-0.0185871	-0.00710446	-	-	-2.10562	-1.59559	-	-
cg16702313	2.41036	0.00467811	-	-	-0.698594	-2.75434	-	-
cg04491089	-0.551924	0.0620049	-	-	0.571866	0.519817	-	-
cg06940168	0.300469	0.143643	-	-	0.985554	0.810561	-	-
cg19266329	-0.102995	0.173128	-	-	0.141934	-0.116943	-	-
cg18842187	0.497604	0.199747	-	-	3.65934	3.7892	-	-
cg12807764	0.0195913	0.323277	-	-	-0.753553	-0.457223	-	-
cg19459094	4.49295	0.417335	-	-	1.07258	-0.391657	-	-
cg18032812	0.10705	0.512266	-	-	0.149931	0.368936	-	-
cg01236573	0.588554	0.525908	-	-	-0.594406	-1.01108	-	-
cg16492851	0.109844	0.558757	-	-	5.12366	5.50952	-	-
cg00232160	0.938401	0.810935	-	-	1.01865	0.984556	-	-
cg00085438	1.58983	2.18423	-	-	-1.3027	-0.532357	-	-
cg06996423	3.29791	2.19312	-	-	-1.46905	-1.89063	-	-
cg23893460	1.60153	2.29156	-	-	5.73094	6.02277	-	-
cg23482898	3.10594	2.37089	-	-	-1.65075	-2.09955	-	-
cg03954858	2.74185	2.58269	-	-	0.963964	1.90903	-	-
cg23975840	2.49218	2.79177	-	-	1.51675	1.10855	-	-
cg08335767	4.72904	3.18554	-	-	4.098	1.83382	-	-
cg26829071	2.97019	3.46765	-	-	-0.921446	-0.809002	-	-
cg07504977	3.17852	3.81476	-	-	4.48896	3.85089	-	-
cg14741228	7.7859	5.57615	-	-	4.73612	2.99293	-	-
cg00045114	0.386266	-	-	-	1.08601	-	-	-
cg00907427	5.03313	-	-	-	-1.03754	-	-	-
cg01054402	-1.19217	-	-	-	0.236503	-	-	-
cg01614597	-3.69809	-	-	-	-4.3386	-	-	-
cg01620757	1.09028	-	-	-	1.83091	-	-	-
cg01859460	0.697319	-	-	-	0.552887	-	-	-
cg02104962	0.628934	-	-	-	-2.19192	-	-	-
cg02707799	-1.6728	-	-	-	-0.264154	-	-	-
cg02995045	4.33391	-	-	-	0.298252	-	-	-
cg03013276	-4.98142	-	-	-	-2.20832	-	-	-
cg03184011	2.01781	-	-	-	-0.157095	-	-	-
cg03331229	1.28381	-	-	-	1.15006	-	-	-
cg03524354	-2.69776	-	-	-	2.3829	-	-	-
cg04134965	1.95616	-	-	-	3.11262	-	-	-
cg04737759	0.548733	-	-	-	-2.25254	-	-	-
cg05205842	0.375994	-	-	-	0.265267	-	-	-
cg05683445	1.01059	-	-	-	-0.309958	-	-	-
cg06638811	-0.740027	-	-	-	-0.347759	-	-	-
cg06657944	-1.06986	-	-	-	-4.42335	-	-	-
cg07104958	-0.189245	-	-	-	1.42216	-	-	-
cg07957491	0.311246	-	-	-	2.94131	-	-	-
cg08559712	3.70142	-	-	-	-0.506509	-	-	-
cg08766770	-0.382583	-	-	-	4.0227	-	-	-
cg09155905	0.875474	-	-	-	2.40171	-	-	-
cg09175009	2.01636	-	-	-	-1.22416	-	-	-
cg09882118	0.843726	-	-	-	0.941501	-	-	-
cg09999582	0.335374	-	-	-	-2.71056	-	-	-
cg10010533	0.027004	-	-	-	1.17079	-	-	-
cg10317175	-0.514635	-	-	-	-0.666553	-	-	-
cg10401367	-5.17763	-	-	-	4.95712	-	-	-
cg11237406	-1.26445	-	-	-	-1.65677	-	-	-
cg11253416	4.62085	-	-	-	3.56126	-	-	-
cg11376147	-11.4212	-	-	-	-10.7133	-	-	-
cg12340144	-1.09124	-	-	-	1.25917	-	-	-
cg12616487	-1.45564	-	-	-	-3.89797	-	-	-
cg12688670	2.22227	-	-	-	-2.93047	-	-	-
cg13442969	-0.607634	-	-	-	-1.00416	-	-	-
cg14576319	-1.5993	-	-	-	5.34643	-	-	-
cg14588638	0.621572	-	-	-	-3.29617	-	-	-
cg16014412	3.61164	-	-	-	1.35547	-	-	-
cg16246545	-2.53813	-	-	-	-0.761305	-	-	-
cg16407699	1.2181	-	-	-	0.119803	-	-	-
cg16696035	-0.101173	-	-	-	-3.47759	-	-	-
cg16882373	-0.36186	-	-	-	-0.80309	-	-	-
cg17485681	-1.07387	-	-	-	-1.85301	-	-	-
cg17757575	0.503681	-	-	-	-0.484337	-	-	-
cg18018313	2.39671	-	-	-	0.991039	-	-	-
cg19238380	-1.92049	-	-	-	-1.74271	-	-	-
cg19939077	-2.54943	-	-	-	-3.00032	-	-	-
cg20249277	-0.741582	-	-	-	-2.44996	-	-	-
cg20303561	1.33529	-	-	-	0.420935	-	-	-
cg20699548	0.616934	-	-	-	0.457121	-	-	-
cg21187770	-0.183032	-	-	-	-0.412231	-	-	-
cg21248060	3.72134	-	-	-	3.25851	-	-	-
cg21429551	-0.260447	-	-	-	0.338577	-	-	-
cg22160883	-3.02962	-	-	-	-1.57228	-	-	-
cg22332722	0.240398	-	-	-	-0.258922	-	-	-
cg22871253	-3.47214	-	-	-	-0.685038	-	-	-
cg22986999	-0.322848	-	-	-	0.7804	-	-	-
cg23166988	1.09367	-	-	-	0.37911	-	-	-
cg23299618	-1.56513	-	-	-	-0.42457	-	-	-
cg23444264	0.35064	-	-	-	-0.0136666	-	-	-
cg23654112	-5.54611	-	-	-	-2.53669	-	-	-
cg25109663	1.05602	-	-	-	-1.37524	-	-	-
cg27492942	1.38635	-	-	-	0.344165	-	-	-
